# Supplementary material for: Engineering band structuring via dual atom modification for an efficient photoanode
Source: Royal Society of Chemistry journal article supplement (doi:10.1039/d3sc05420a), 2023-11-06
Supplement: d3sc05420a1.pdf [file d3sc05420a1.pdf]

## Engineering band structure via dual atoms modification for the efficient photoanode

Xiaodong Wang<sup>a,1</sup>, Huijuan Zhang<sup>a,b,1</sup>, Chuanzhen Feng<sup>a</sup>, Yu Wang<sup>a,b\*</sup>

<sup>a</sup> The School of Chemistry and Chemical Engineering, National Key Laboratory of Power Transmission Equipment Technology, Chongqing University, 174 Shazheng Street, Shapingba District, Chongqing City, 400044, P.R. China

<sup>b</sup> College of Chemistry and Environmental Science, Inner Mongolia Normal University, Huhehaote, 010022, P. R. China

<sup>1</sup> These authors contributed equally to this work.

E-mail address: wangy@cqu.edu.cn

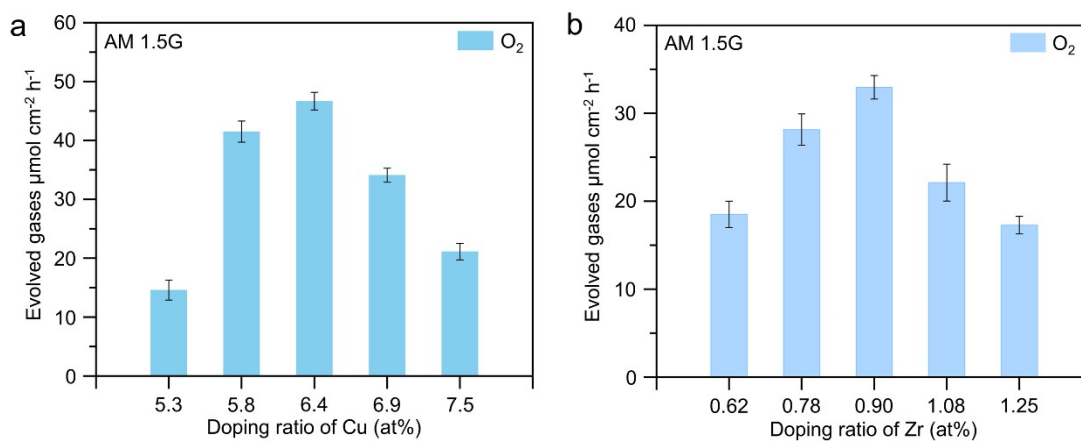

Figure S1. O<sub>2</sub> evolution amount in different a) Cu doping Ta<sub>3</sub>N<sub>5</sub> and b) Zr doping Ta<sub>3</sub>N<sub>5</sub>, respectively. Error bars are the standard deviation. Both photoelectrodes were loaded with cocatalyst NiCoFe-B<sub>i</sub>. Then, the NiCoFe-B<sub>i</sub>/Cu-Ta<sub>3</sub>N<sub>5</sub>/FTO and NiCoFe-B<sub>i</sub>/Zr-Ta<sub>3</sub>N<sub>5</sub>/FTO photoanode were held at 1.0 V<sub>RHE</sub> in 1 M KOH under AM 1.5G simulated sunlight for 1 h.

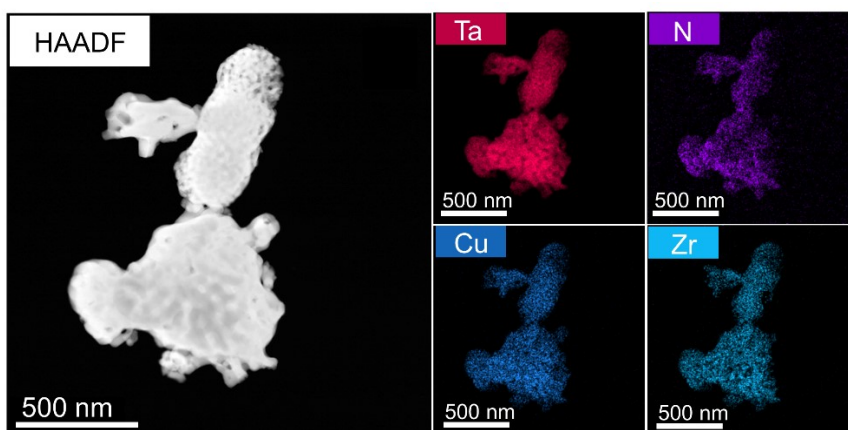

Figure S2. HAADF-STEM image of Cu,Zr<sub>h</sub>-Ta<sub>3</sub>N<sub>5</sub> and Corresponding EDS elemental mappings.

Cu,Zr<sub>h</sub>-Ta<sub>3</sub>N<sub>5</sub> synthesized by conventional methods shows a uniform distribution of Zr.

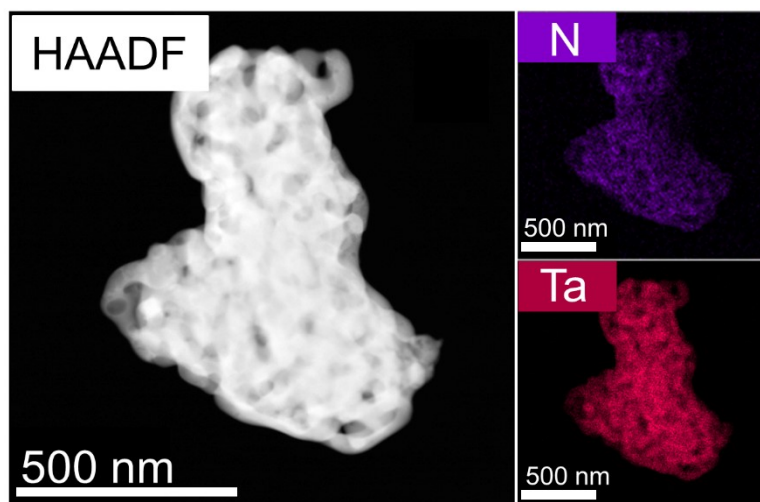

Figure S3. HAADF-STEM image of pristine Ta<sub>3</sub>N<sub>5</sub> and Corresponding EDS elemental mappings.

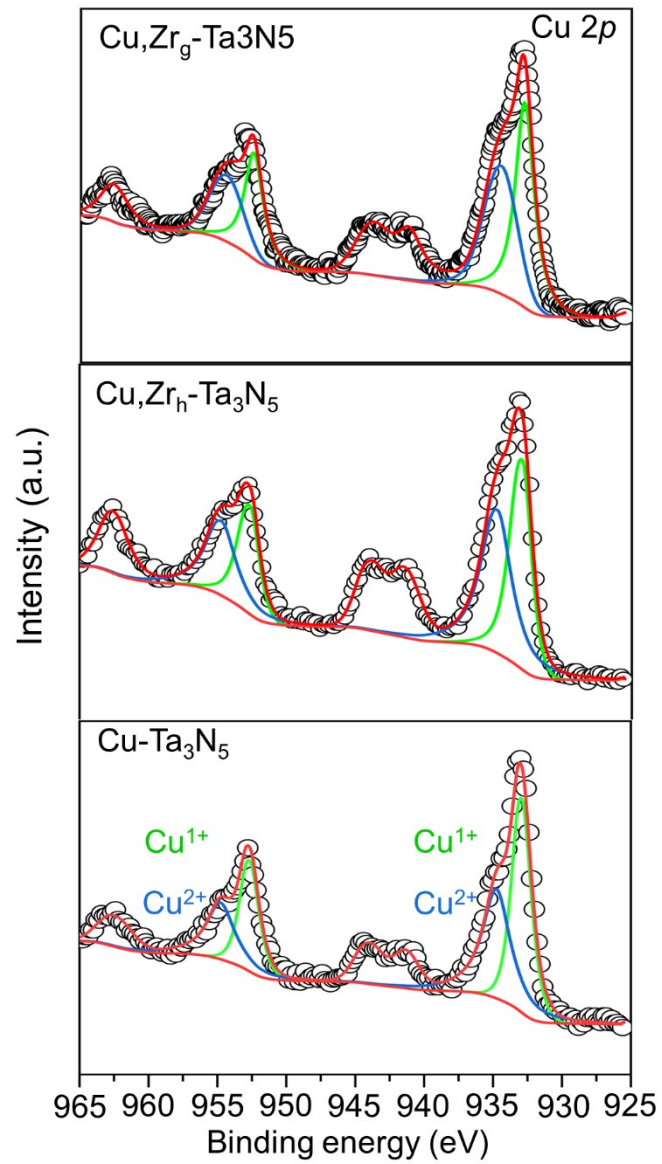

Figure S4. Cu 2p high-resolution XPS spectra of  $\text{Cu-Ta}_3\text{N}_5$ ,  $\text{Cu,Zr}_h\text{-Ta}_3\text{N}_5$  and  $\text{Cu,Zr}_g\text{-Ta}_3\text{N}_5$ .

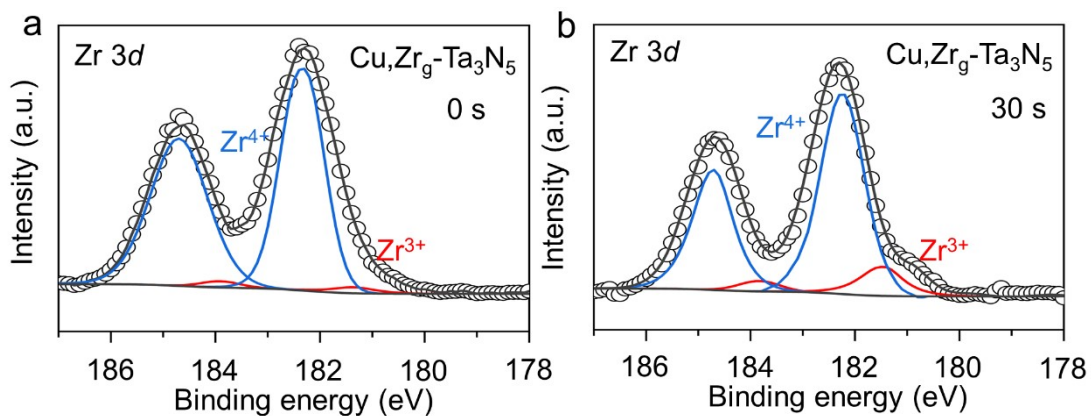

Figure S5. Zr 3d High-resolution XPS spectra of  $\text{Cu,Zr}_g\text{-Ta}_3\text{N}_5$  under different etching times, a) 0 s and b) 30 s.

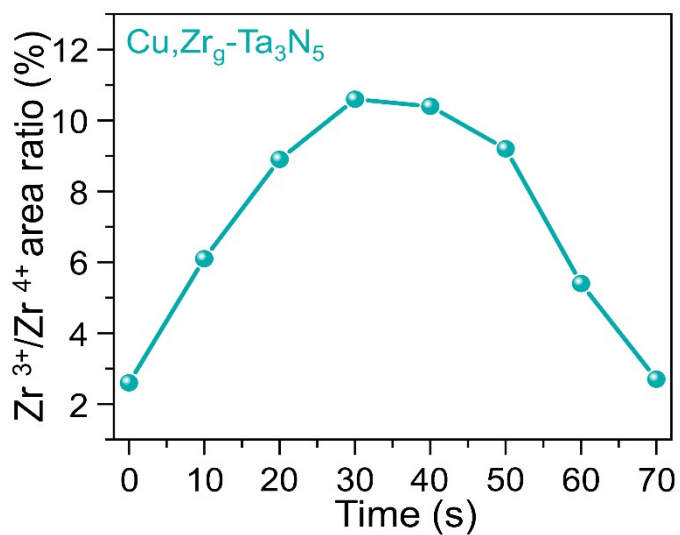

Figure S6.  $\text{Zr}^{3+}/\text{Zr}^{4+}$  area ratio of  $\text{Cu,Zr}_g\text{-Ta}_3\text{N}_5$  vs etching time obtained from XPS measurements. The volcano-shaped curve indicates that the  $\text{Zr}^{3+}/\text{Zr}^{4+}$  area ratio follows the regularity of gradient changes.

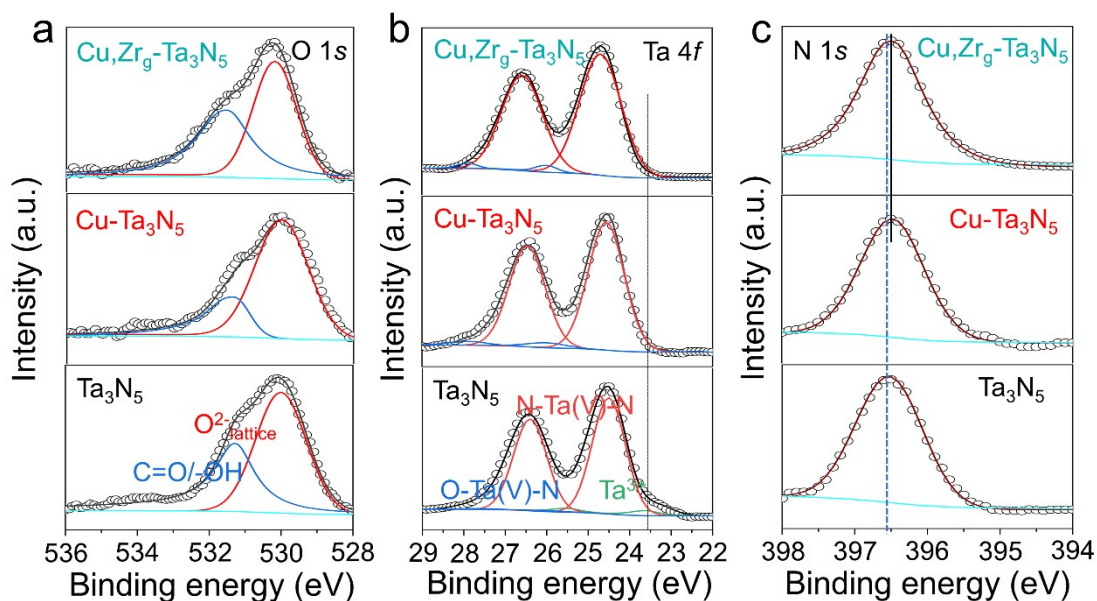

Figure S7. a) O 1s; b) Ta 4f and c) N 1s high-resolution XPS spectra of Ta<sub>3</sub>N<sub>5</sub>, Cu-Ta<sub>3</sub>N<sub>5</sub> and Cu,Zr<sub>9</sub>-Ta<sub>3</sub>N<sub>5</sub>.

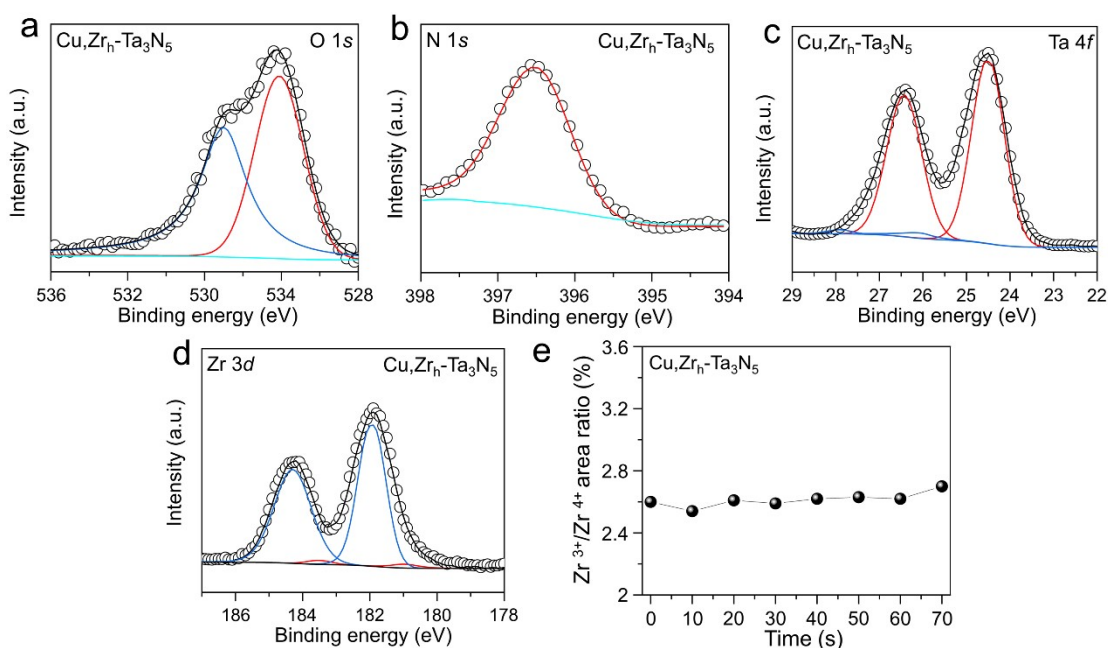

Figure S8. a) O 1s; b) N 1s; c) Ta 4f; d) Zr 3d high-resolution XPS spectra of Cu,Zr<sub>1</sub>-Ta<sub>3</sub>N<sub>5</sub> and e) Zr<sup>3+</sup>/Zr<sup>4+</sup> area ratio of Cu,Zr<sub>1</sub>-Ta<sub>3</sub>N<sub>5</sub> vs etching time obtained from XPS measurements. As shown in Figure R1, according to the XPS etching curve, it can be seen that the ratio of Zr<sup>3+</sup> and Zr<sup>4+</sup> changes little over time, indicating that the interaction of Cu and Zr in Cu,Zr<sub>1</sub>-Ta<sub>3</sub>N<sub>5</sub> is similar. In addition, we made a change in the supporting information and marked it in red.

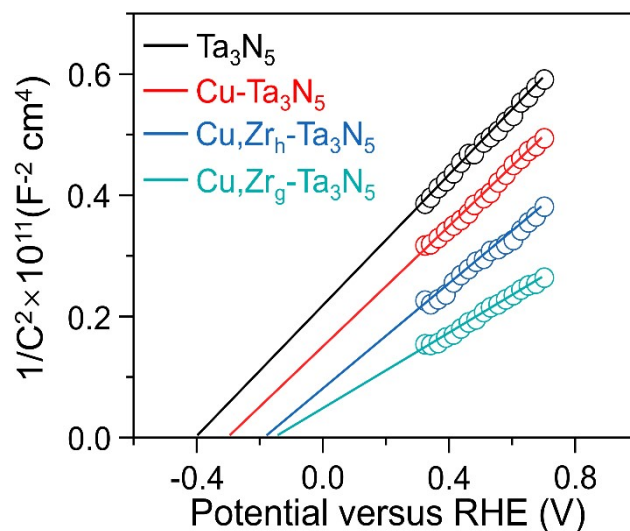

Figure S9. Mott-Schottky plot for  $\text{Ta}_3\text{N}_5$ ,  $\text{Cu-Ta}_3\text{N}_5$ ,  $\text{Cu,Zr}_h\text{-Ta}_3\text{N}_5$  and  $\text{Cu,Zr}_g\text{-Ta}_3\text{N}_5$  without co-catalyst under dark conditions. The M-S plot only exhibits the positive slope, suggesting its intrinsic n-type conductivity.

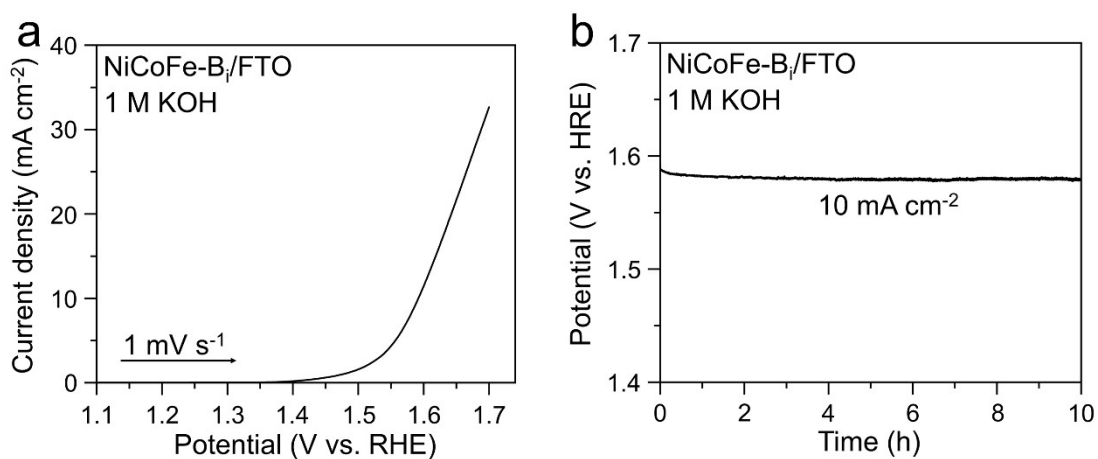

Figure S10. Electrocatalytic OER performance of NiCoFe-B<sub>i</sub> catalyst deposited on FTO electrode in 1 M KOH. a) The OER polarization curve of the NiCoFe-B<sub>i</sub> catalyst; b) Stability test of the NiCoFe-B<sub>i</sub> catalyst on FTO measured at constant current density of 10 mA cm<sup>-2</sup> for 10 h. The overpotential without iR correction.

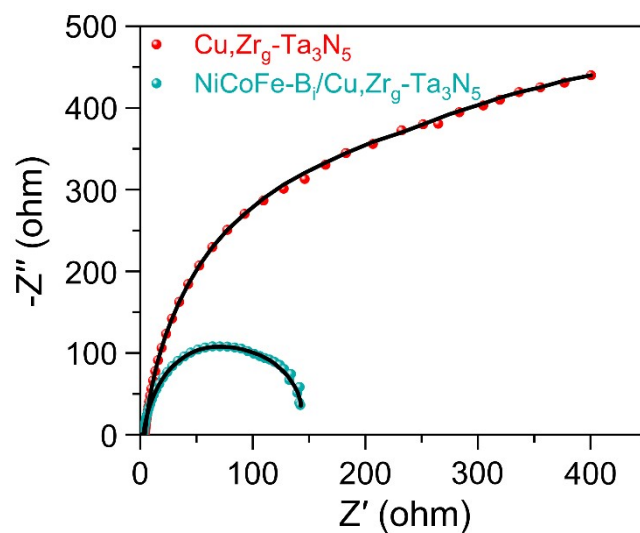

Figure S11. Electrochemical impedance spectra for  $\text{Cu,Zr}_g\text{-Ta}_3\text{N}_5$  and  $\text{NiCoFe-B}_i/\text{Cu,Zr}_g\text{-Ta}_3\text{N}_5$ .

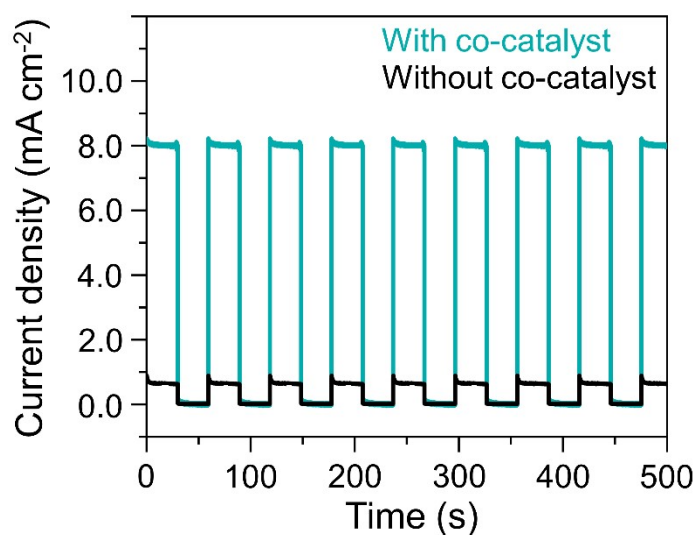

Figure S12. Chopped I-T Curve of  $\text{Cu,Zr}_g\text{-Ta}_3\text{N}_5$  with or without  $\text{NiCoFe-B}_i$  co-catalyst.

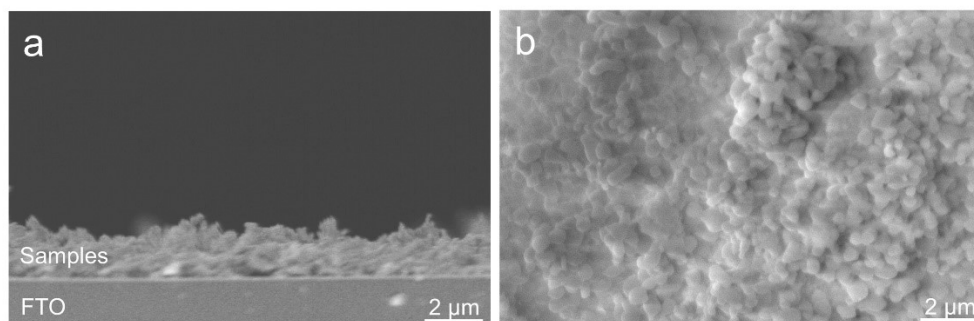

Figure S13. a) Cross-sectional SEM image of  $\text{Cu,Zr}_g\text{-Ta}_3\text{N}_5$ ; b) Top-view SEM image of  $\text{NiCoFe-B}_i/\text{Cu,Zr}_g\text{-Ta}_3\text{N}_5$ .

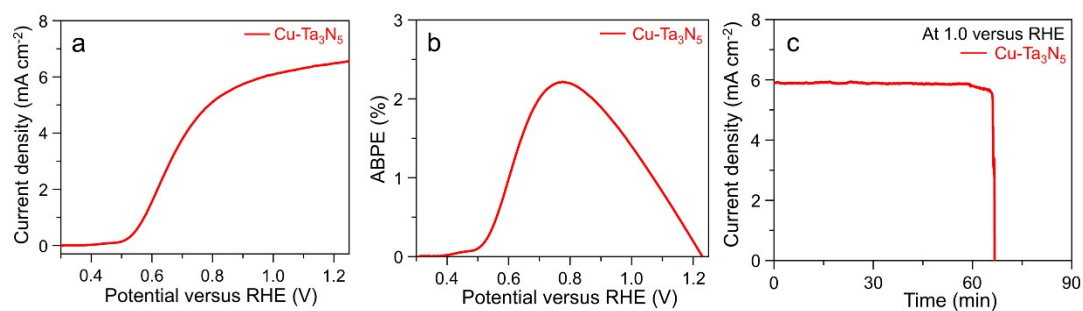

Figure S14. a) J-V curves for Cu-Ta<sub>3</sub>N<sub>5</sub>; b) ABPE of the Cu-Ta<sub>3</sub>N<sub>5</sub> calculated from J-V curves from a; c) Steady-state photocurrent of Cu-Ta<sub>3</sub>N<sub>5</sub> with NiCoFe-B<sub>i</sub> co-catalyst at 1.0 V versus RHE under AM 1.5G simulated sunlight.

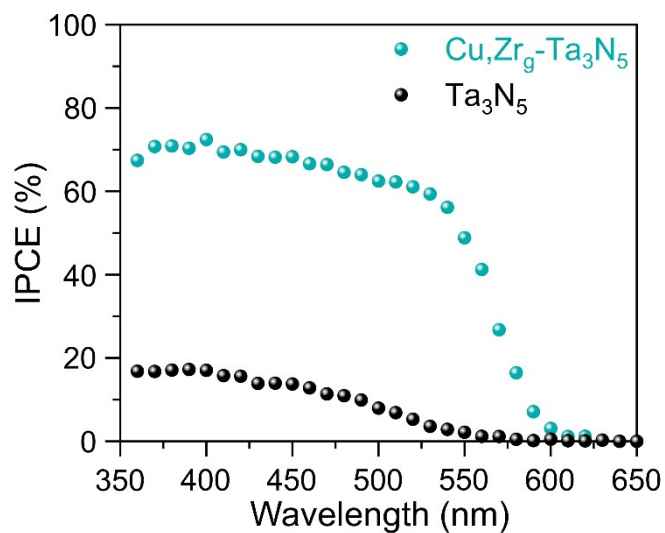

Figure S15. The IPCE spectrum of pristine Ta<sub>3</sub>N<sub>5</sub> and Cu,Zr<sub>9</sub>-Ta<sub>3</sub>N<sub>5</sub>.



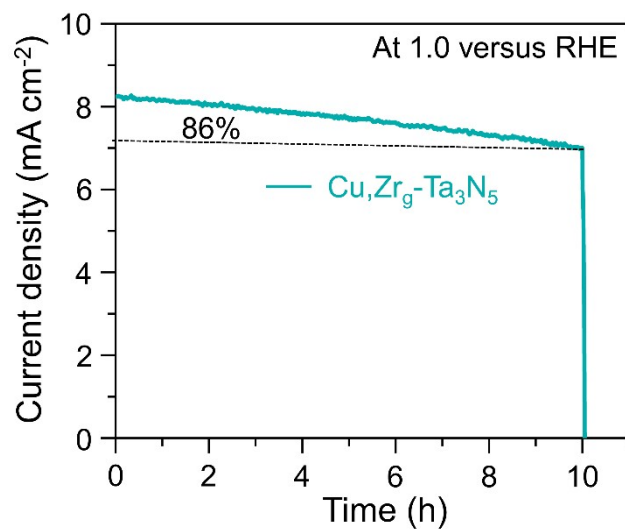

Figure S16. Stability of the photocurrent for NiCoFe-Bi/Cu,Zr<sub>g</sub>-Ta<sub>3</sub>N<sub>5</sub> photoanode at 1.0 V versus RHE under AM 1.5G in 1 M KOH.

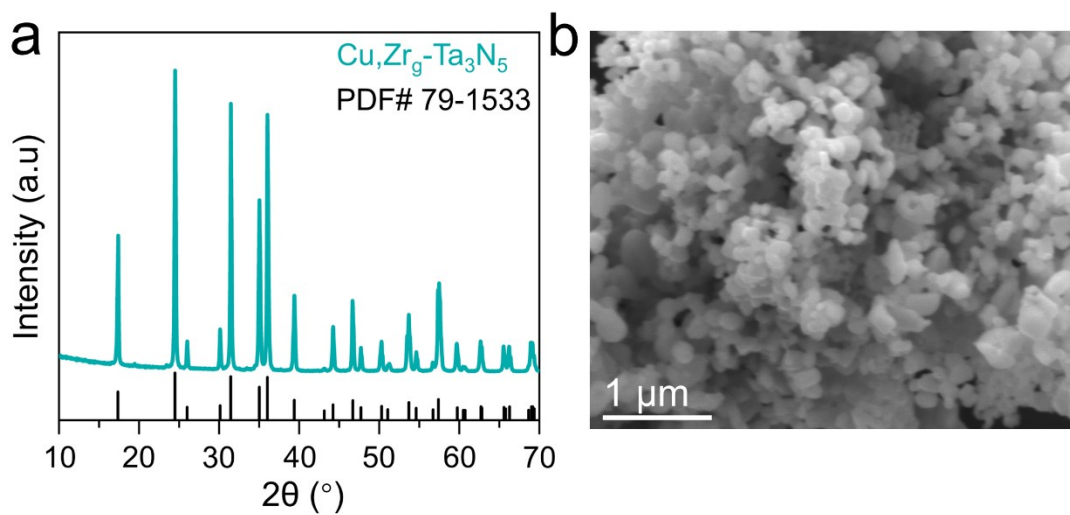

Figure S17. a) XRD pattern and b) SEM image for Cu,Zr<sub>g</sub>-Ta<sub>3</sub>N<sub>5</sub> after PEC water splitting test.

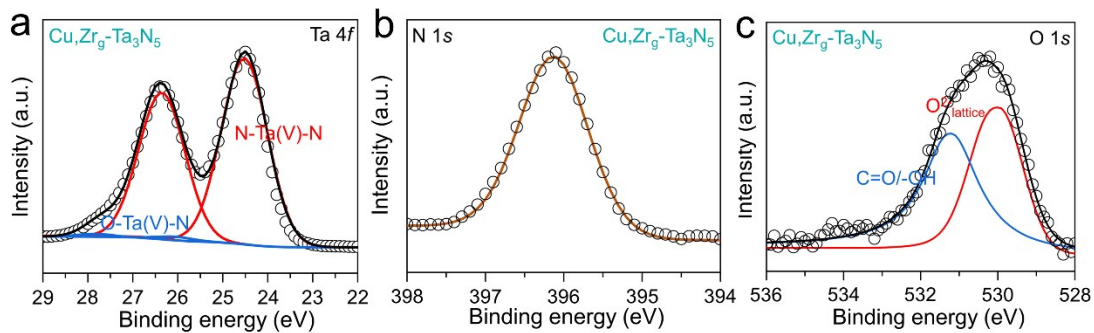

Figure S18. a) Ta 4*f*, b) N 1*s* and c) O 1*s* high-resolution XPS spectra of Cu,Zr<sub>g</sub>-Ta<sub>3</sub>N<sub>5</sub> after PEC water splitting test.

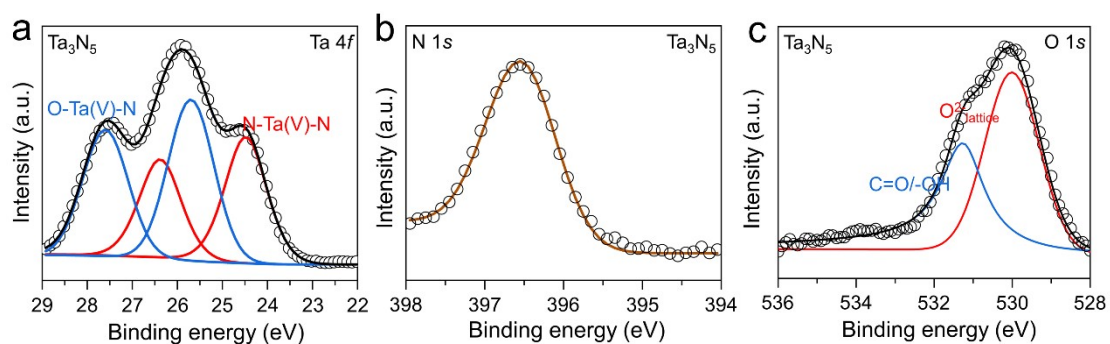

Figure S19. a) Ta 4*f*, b) N 1*s* and c) O 1*s* high-resolution XPS spectra of pristine Ta<sub>3</sub>N<sub>5</sub> after PEC water splitting test.

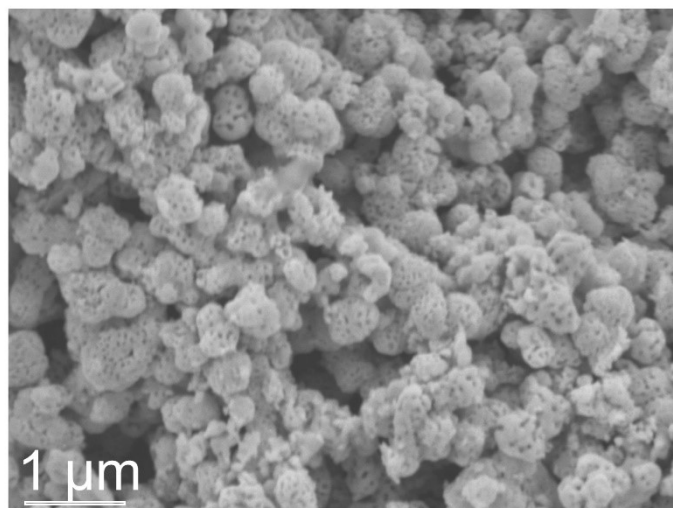

Figure S20. SEM image of pristine Ta<sub>3</sub>N<sub>5</sub> after PEC water splitting test.

Table S1. Chemical compositions of Various Ta<sub>3</sub>N<sub>5</sub> material as determined by ICP-AES and combustion analysis.

| Sample                                             | Weight ratio (wt%)/Atomic ratio (at%) |                 |                 |                |                |
|----------------------------------------------------|---------------------------------------|-----------------|-----------------|----------------|----------------|
|                                                    | Ta <sup>l</sup>                       | Cu <sup>l</sup> | Zr <sup>l</sup> | N <sup>c</sup> | O <sup>c</sup> |
| Cu,Zr <sub>g</sub> -Ta <sub>3</sub> N <sub>5</sub> | 80.1/30.9                             | 5.4/5.9         | 1.2/0.9         | 9.8/48.8       | 3.1/13.5       |
| Cu,Zr <sub>h</sub> -Ta <sub>3</sub> N <sub>5</sub> | 80.3/30.9                             | 5.3/5.8         | 1.3/1.0         | 9.9/49.2       | 3.0/13.1       |
| Cu-Ta <sub>3</sub> N <sub>5</sub>                  | 82.5/32.8                             | 5.1/5.8         | 0/0             | 11.1/57.0      | 1.0/4.5        |
| Ta <sub>3</sub> N <sub>5</sub>                     | 87.9/37.5                             | 0/0             | 0/0             | 11.0/60.6      | 0.7/1.9        |

<sup>l</sup> Measured by ICP-AES

<sup>c</sup> Measured by the N-O combustion analyzer

Table S2. Bandgap and band positions of pristine Ta<sub>3</sub>N<sub>5</sub>, Cu-Ta<sub>3</sub>N<sub>5</sub> and Cu,Zr<sub>h</sub>-Ta<sub>3</sub>N<sub>5</sub> photoanodes determined by UPS spectra and UV-vis absorption spectra.

| Sample                                             | E <sub>BG</sub> (eV) | E <sub>F</sub> (eV) | E <sub>VB</sub> (eV) | E <sub>CB</sub> (eV) |
|----------------------------------------------------|----------------------|---------------------|----------------------|----------------------|
| Pristine Ta <sub>3</sub> N <sub>5</sub>            | 2.06                 | -3.92               | -5.97                | -3.91                |
| Cu-Ta <sub>3</sub> N <sub>5</sub>                  | 2.08                 | -4.10               | -5.99                | -3.91                |
| Cu,Zr <sub>h</sub> -Ta <sub>3</sub> N <sub>5</sub> | 2.10                 | -4.37               | -6.31                | -4.21                |

Table S3. Areas of the deconvoluted Ta 4f XPS peaks at specific binding energies.

| Sample                                             | Ta species         |         |       |                    |        |           |                    |       |       |
|----------------------------------------------------|--------------------|---------|-------|--------------------|--------|-----------|--------------------|-------|-------|
|                                                    | N-Ta(V)-N          |         |       | Ta <sup>3+</sup>   |        | O-Ta(V)-N |                    |       |       |
|                                                    | Peak area at B.E.= |         | Ratio | Peak area at B.E.= |        | Ratio     | Peak area at B.E.= |       | Ratio |
|                                                    | 24.5               | 26.4    | (%)   | 23.6               | 25.5   | (%)       | 26.0               | 27.9  | (%)   |
| Cu,Zr <sub>g</sub> -Ta <sub>3</sub> N <sub>5</sub> | 29353.0            | 22015.3 | 95.8  | 0                  | 0      | 0         | 1277.4             | 958.1 | 4.2   |
| Cu-Ta <sub>3</sub> N <sub>5</sub>                  | 31996.7            | 23998.1 | 96.7  | 0                  | 0      | 0         | 1083.3             | 812.5 | 3.3   |
| Ta <sub>3</sub> N <sub>5</sub>                     | 34655.7            | 25992.4 | 85.8  | 5068.7             | 3801.6 | 12.5      | 664.5              | 498.4 | 1.7   |

Table S4. Crystallite size of various Ta<sub>3</sub>N<sub>5</sub> materials is obtained by applying Scherrer equation.

| Peak position | Crystallite size (nm)                   |                                   |                                   |                                                    |                                                    |
|---------------|-----------------------------------------|-----------------------------------|-----------------------------------|----------------------------------------------------|----------------------------------------------------|
|               | Pristine Ta <sub>3</sub> N <sub>5</sub> | Cu-Ta <sub>3</sub> N <sub>5</sub> | Zr-Ta <sub>3</sub> N <sub>5</sub> | Cu,Zr <sub>h</sub> -Ta <sub>3</sub> N <sub>5</sub> | Cu,Zr <sub>g</sub> -Ta <sub>3</sub> N <sub>5</sub> |
| (110)         | 33.3                                    | 31.8                              | 32.4                              | 36.2                                               | 41.8                                               |

Table S5. Fitted parameters for the TRPL decay of different Ta<sub>3</sub>N<sub>5</sub> materials.

| <b>Sample</b>                                      | <b><math>\tau_1</math> (ns)</b> | <b><math>f_1</math></b> | <b><math>\tau_2</math> (ns)</b> | <b><math>f_2</math></b> | <b><math>\tau_{AV}</math> (ns)</b> | <b><math>\chi^2</math></b> |
|----------------------------------------------------|---------------------------------|-------------------------|---------------------------------|-------------------------|------------------------------------|----------------------------|
| Pristine-Ta <sub>3</sub> N <sub>5</sub>            | 0.11                            | 93.25                   | 2.34                            | 6.75                    | 0.26                               | 1.049                      |
| Cu,Zr <sub>h</sub> -Ta <sub>3</sub> N <sub>5</sub> | 0.14                            | 85.56                   | 2.93                            | 14.44                   | 1.19                               | 1.187                      |
| Cu,Zr <sub>g</sub> -Ta <sub>3</sub> N <sub>5</sub> | 0.21                            | 65.11                   | 3.65                            | 34.89                   | 1.41                               | 1.119                      |

The  $f_1$  and  $f_2$  are the fractional intensities;  $\tau_1$  and  $\tau_2$  are the lifetimes;  $\tau_{AV}$  is the intensity-weighted average lifetime, which is equal to  $f_1\tau_1 + f_2\tau_2$ ; and  $\chi^2$  is the reduced chi-square value.
